# Supplementary material for: The Value of Glycemic Control Prior to Cancer Diagnosis on All-Cause Mortality among Patients with Type 2 Diabetes in Dutch Primary Care
Source: Oxford University Press journal article supplement (doi:10.1158/1055-9965.epi-22-0766), 2022-11-28
Supplement: epi-22-0766_supplementary_table_5_suppst5.docx [file epi-22-0766_supplementary_table_5_suppst5.docx]

| **Supplementary Table 5. Quality of glycemic control by cancer stage** | | | | | | | | | | | | |
| --- | --- | --- | --- | --- | --- | --- | --- | --- | --- | --- | --- | --- |
| **Cancer stage n (%)** | **Breast cancer** | | | | **Colorectal cancer** | | | | **Prostate cancer** | | | |
| At target | Not at target | Unknown | P-value* | At target | Not at target | Unknown | P-value* | At target | Not at target | Unknown | P-value* |
| In situ | 37 (67.3) | 14 (25.5) | 4 (7.3) | 0.510 | 65 (71.4) | 19 (28.9) | 7 (7.7) | 0.105 | 0 | 0 | 0 | **0.029** |
| I | 178 (71.5) | 55 (22.1) | 16 (6.4) | 95 (68.4) | 31 (22.3) | 13 (9.4) | 130 (76.0) | 32 (18.7) | 9 (5.3) |
| II | 165 (71.7) | 53 (23.0) | 12 (5.2) | 166 (69.8) | 54 (22.7) | 18 (7.6) | 117 (65.7) | 58 (32.6) | 3 (1.7) |
| III | 48 (64.9) | 23 (31.1) | 3 (4.1) | 198 (71.7) | 71 (25.7) | 7 (2.5) | 63 (76.8) | 17 (20.7) | 2 (2.4) |
| Unknown | 11 (91.7) | 0 | 1 (8.3) | 21 (70.0) | 5 (16.7) | 4 (13.3) | 4 (57.1) | 3 (42.9) | 0 |
| ** P-value generated from Pearson chi2 test.* | | | | | | | | | | | | |
